# Supplementary material for: Gender Differences in Bile Acids and Microbiota in Relationship with Gender Dissimilarity in Steatosis Induced by Diet and FXR Inactivation
Source: PubMed Central journal article supplement (PMC5431816; doi:10.1038/s41598-017-01576-9), 2017-05-11
Supplement: 41598_2017_1576_MOESM1_ESM.pdf [file 41598_2017_1576_MOESM1_ESM.pdf]

**Gender Differences in Bile Acids and Microbiota in Relationship with Gender  
Dissimilarity in Steatosis Induced by Diet and FXR Inactivation**

Lili Sheng, Prasant Kumar Jena, Hui-Xin Liu, Karen M. Kalanetra, Frank J. Gonzalez, Samuel  
W. French, Viswanathan V. Krishnan, David A. Mills, Yu-Jui Yvonne Wan

**Table of contents**

Supplementary Tables.....2  
Supplementary Figures.....7  
Supplementary References.....14

**Supplementary Tables**

**Supplementary Table S1. The concentration ( $\mu\text{M}$ ) or ratio of hepatic bile acid in CD- and WD-fed WT and FXR KO mice of both genders.**

| Bile acid              | Male   |       |        |       |        |        |        |       | Female |        |        |       |         |        |        |        |
|------------------------|--------|-------|--------|-------|--------|--------|--------|-------|--------|--------|--------|-------|---------|--------|--------|--------|
|                        | WT     |       |        |       | FXR KO |        |        |       | WT     |        |        |       | FXR KO  |        |        |        |
|                        | CD     |       | WD     |       | CD     |        | WD     |       | CD     |        | WD     |       | CD      |        | WD     |        |
|                        | Ave    | SD    | Ave    | SD    | Ave    | SD     | Ave    | SD    | Ave    | SD     | Ave    | SD    | Ave     | SD     | Ave    | SD     |
| TCA                    | 26.221 | 6.938 | 29.944 | 8.420 | 89.964 | 16.165 | 99.931 | 5.955 | 40.000 | 11.883 | 39.383 | 7.245 | 111.400 | 17.011 | 98.900 | 17.458 |
| $\alpha$ -MCA          | 0.327  | 0.087 | 0.288  | 0.072 | 0.286  | 0.071  | 0.446  | 0.074 | 0.152  | 0.050  | 0.309  | 0.090 | 0.172   | 0.049  | 0.416  | 0.152  |
| CDCA                   | 0.009  | 0.002 | 0.008  | 0.002 | 0.006  | 0.002  | 0.011  | 0.002 | 0.002  | 0.001  | 0.006  | 0.002 | 0.007   | 0.001  | 0.004  | 0.004  |
| UDCA                   | 0.015  | 0.004 | 0.023  | 0.003 | 0.023  | 0.003  | 0.047  | 0.004 | 0.005  | 0.002  | 0.007  | 0.003 | 0.003   | 0.002  | 0.007  | 0.003  |
| HDCA                   | 0.018  | 0.005 | 0.037  | 0.009 | 0.044  | 0.010  | 0.066  | 0.030 | 0.007  | 0.007  | 0.014  | 0.007 | 0.006   | 0.009  | 0.021  | 0.005  |
| TLCA <sup>a</sup>      | 0.032  | 0.010 | 0.047  | 0.016 | 0.065  | 0.027  | 0.107  | 0.039 | 0.009  | 0.005  | 0.035  | 0.013 | NA      | NA     | NA     | NA     |
| DCA                    | 0.037  | 0.010 | 0.065  | 0.012 | 0.104  | 0.023  | 0.121  | 0.008 | 0.090  | 0.017  | 0.058  | 0.010 | 0.082   | 0.032  | 0.084  | 0.025  |
| $\beta$ -MCA           | 0.366  | 0.097 | 0.617  | 0.117 | 1.352  | 0.262  | 5.360  | 1.180 | 0.308  | 0.129  | 0.335  | 0.101 | 0.598   | 0.164  | 1.540  | 0.536  |
| LCA                    | 0.004  | 0.001 | 0.003  | 0.001 | 0.003  | 0.001  | 0.003  | 0.001 | 0.002  | 0.001  | 0.003  | 0.001 | 0.003   | 0.001  | 0.003  | 0.001  |
| T- $\alpha,\beta$ -MCA | 19.293 | 5.105 | 27.369 | 4.266 | 32.093 | 4.177  | 41.813 | 4.381 | 25.932 | 2.955  | 21.767 | 5.331 | 37.417  | 2.870  | 36.550 | 8.987  |
| TCDCA                  | 2.776  | 1.651 | 2.746  | 0.722 | 3.074  | 1.361  | 2.984  | 1.634 | 2.927  | 1.026  | 3.920  | 1.142 | 2.683   | 0.761  | 2.365  | 0.389  |
| CA                     | 0.190  | 0.050 | 0.161  | 0.042 | 0.159  | 0.041  | 0.262  | 0.043 | 0.228  | 0.029  | 0.269  | 0.053 | 0.254   | 0.028  | 0.172  | 0.089  |

<sup>a</sup>: TLCA was under the limit of detection in CD- and WD-fed FXR KO female mice.

**Supplementary Table S2. Relative abundance (%) of cecal microbiota in CD- and WD-fed WT and FXR KO mice of both genders at phylum level.**

| Phylum          | Male  |       |       |       |        |      |       |      | Female |       |       |      |        |      |       |      |
|-----------------|-------|-------|-------|-------|--------|------|-------|------|--------|-------|-------|------|--------|------|-------|------|
|                 | WT    |       |       |       | FXR KO |      |       |      | WT     |       |       |      | FXR KO |      |       |      |
|                 | CD    |       | WD    |       | CD     |      | WD    |      | CD     |       | WD    |      | CD     |      | WD    |      |
|                 | Ave   | SD    | Ave   | SD    | Ave    | SD   | Ave   | SD   | Ave    | SD    | Ave   | SD   | Ave    | SD   | Ave   | SD   |
| Actinobacteria  | 0.36  | 0.46  | 0.09  | 0.11  | 0.03   | 0.10 | 0.13  | 0.47 | 0.06   | 0.10  | 1.76  | 1.40 | 0.00   | 0.00 | 0.00  | 0.00 |
| Bacteroidetes   | 23.33 | 10.59 | 14.65 | 10.65 | 18.16  | 5.11 | 13.20 | 4.14 | 28.95  | 11.69 | 14.60 | 6.28 | 17.98  | 4.20 | 15.67 | 4.06 |
| Deferribacteres | 0.00  | 0.00  | 0.00  | 0.00  | 0.35   | 0.43 | 1.58  | 0.80 | 0.00   | 0.00  | 0.00  | 0.00 | 0.53   | 0.45 | 2.13  | 1.11 |
| Firmicutes      | 73.88 | 9.15  | 69.05 | 14.64 | 22.62  | 5.27 | 17.95 | 5.08 | 59.84  | 10.86 | 75.95 | 5.96 | 20.08  | 3.43 | 10.74 | 3.43 |
| Proteobacteria  | 1.70  | 2.22  | 12.13 | 16.72 | 57.88  | 6.50 | 66.25 | 9.07 | 4.91   | 2.69  | 0.05  | 0.04 | 60.09  | 4.52 | 71.13 | 8.41 |
| Tenericutes     | 0.00  | 0.00  | 0.08  | 0.08  | 0.05   | 0.09 | 0.01  | 0.01 | 0.00   | 0.00  | 0.00  | 0.00 | 0.01   | 0.01 | 0.00  | 0.01 |
| Verrucomicrobia | 0.73  | 0.77  | 4.00  | 5.91  | 0.71   | 0.62 | 0.68  | 0.43 | 5.81   | 3.85  | 7.47  | 1.69 | 1.31   | 0.88 | 0.28  | 0.27 |
| Other           | 0.00  | 0.00  | 0.00  | 0.00  | 0.20   | 0.18 | 0.20  | 0.12 | 0.43   | 0.69  | 0.16  | 0.11 | 0.01   | 0.01 | 0.06  | 0.09 |

**Supplementary Table S3. Fold change of phenotypes and hepatic bile acids in Western diet-fed wild type mice and control diet-fed FXR KO mice of both genders.**

| Phenotype              | WD-fed WT vs. CD-fed FXR KO |        |
|------------------------|-----------------------------|--------|
|                        | Male                        | Female |
| ALT                    | 0.67*                       | 0.92   |
| Hepatic cholesterol    | 1.77*                       | 1.69*  |
| LPS                    | 0.65*                       | 1.21   |
| Body weight            | 2.00*                       | 2.18*  |
| <b>Bile acid</b>       |                             |        |
| TCA                    | 0.33*                       | 0.35*  |
| T- $\alpha,\beta$ -MCA | 0.85                        | 0.58*  |
| $\alpha$ -MCA          | 1.01                        | 1.80*  |
| UDCA                   | 1.04                        | 2.79*  |
| HDCA                   | 0.85                        | 2.12*  |
| DCA                    | 0.63*                       | 0.70   |
| $\beta$ -MCA           | 0.46*                       | 0.56*  |
| LCA                    | 1.07                        | 0.96   |
| TCDCA                  | 0.89                        | 1.46   |
| CA                     | 1.01                        | 1.06   |
| CDCA                   | 1.41                        | 0.97   |

|                   |      |    |
|-------------------|------|----|
| TLCA <sup>a</sup> | 0.72 | NA |
|-------------------|------|----|

\*: Fold change  $\geq 1.5$  or  $\leq 0.67$ , and  $p < 0.05$ .

<sup>a</sup>: TLCA was under the limit of detection in CD-fed FXR KO female mice.

**Supplementary Table S4. List of primers used in this study to determine functional microbial genes.**

| <b>Target genes and primers</b>          | <b>Sequence (5' – 3')</b>       | <b>Annealing temperature</b> | <b>Reference</b> |
|------------------------------------------|---------------------------------|------------------------------|------------------|
| Functional gene for secondary bile acids |                                 |                              |                  |
| baiJF                                    | TCAGGACGTGGAGGCGATCCA           | 60°C                         | 1                |
| baiJR                                    | TACRTGATACTGGTAGCTCCA           |                              |                  |
| Functional gene for butyrate producer    |                                 |                              |                  |
| bcoAF                                    | GCIGAICATTTACITGGAAYSITGGCAYATG | 60°C                         | 2, 3             |
| bcoAR                                    | CCTGCCTTTGCAATRTCIACRAANGC      |                              |                  |
| Functional gene for hydrogen sulfide     |                                 |                              |                  |
| dsrAF                                    | GCCGTTACTGTGACCAGCC             | 60°C                         | 4                |
| dsrAR                                    | GGTGGAGCCGTGCATGTT              |                              |                  |
| Functional gene for BA de-conjugation    |                                 |                              |                  |
| bshF                                     | ATGGGCGGACTAGGATTACC            | 54°C                         | 5,6              |
| bshR                                     | TGCCACTCTGTCTGCATC              |                              |                  |

Supplementary Figures

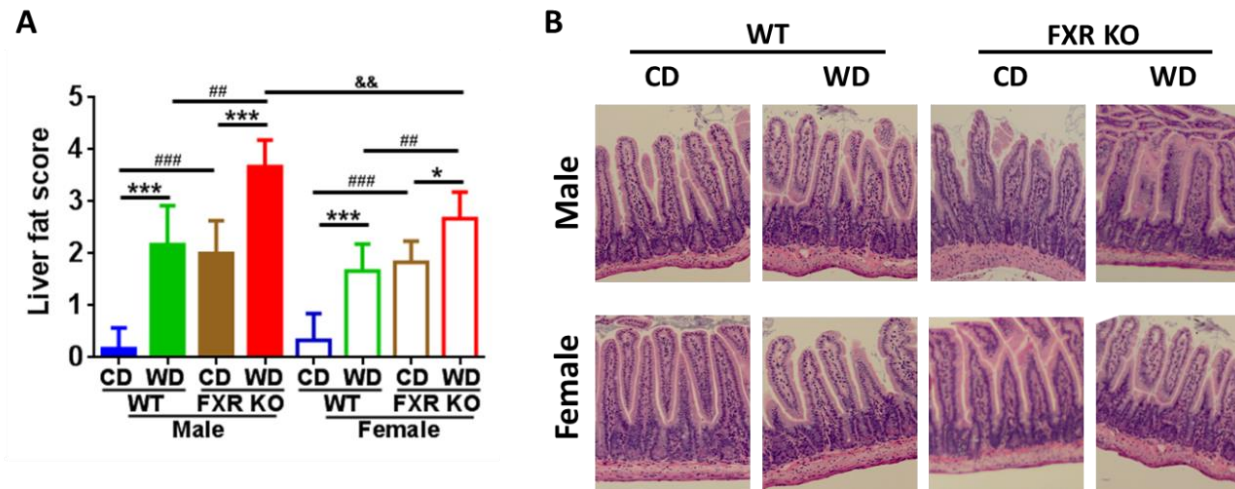

**Fig. S1.** Liver fat score (A) and representative H&E-stained ileum sections (B).  $n = 6$  per group. Data are expressed as mean  $\pm$  SD. One-way ANOVA with Tukey's correction. \*  $p < 0.05$ , \*\*  $p < 0.01$ , \*\*\*  $p < 0.001$  for diet comparison; #  $p < 0.05$ , ##  $p < 0.01$ , ###  $p < 0.001$  for genotype comparison; &  $p < 0.05$ , &&  $p < 0.01$ , &&&  $p < 0.001$  for gender comparison. Magnification,  $\times 40$ .

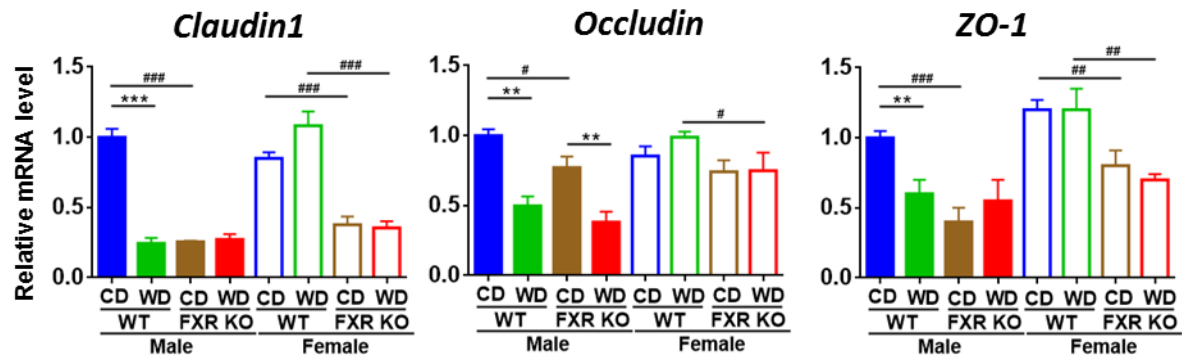

**Fig. S2. Tight junction gene expression in the ileum.** \*  $p < 0.05$ , \*\*  $p < 0.01$ , \*\*\*  $p < 0.001$  for diet comparison; #  $p < 0.05$ , ##  $p < 0.01$ , ###  $p < 0.001$  for genotype comparison;



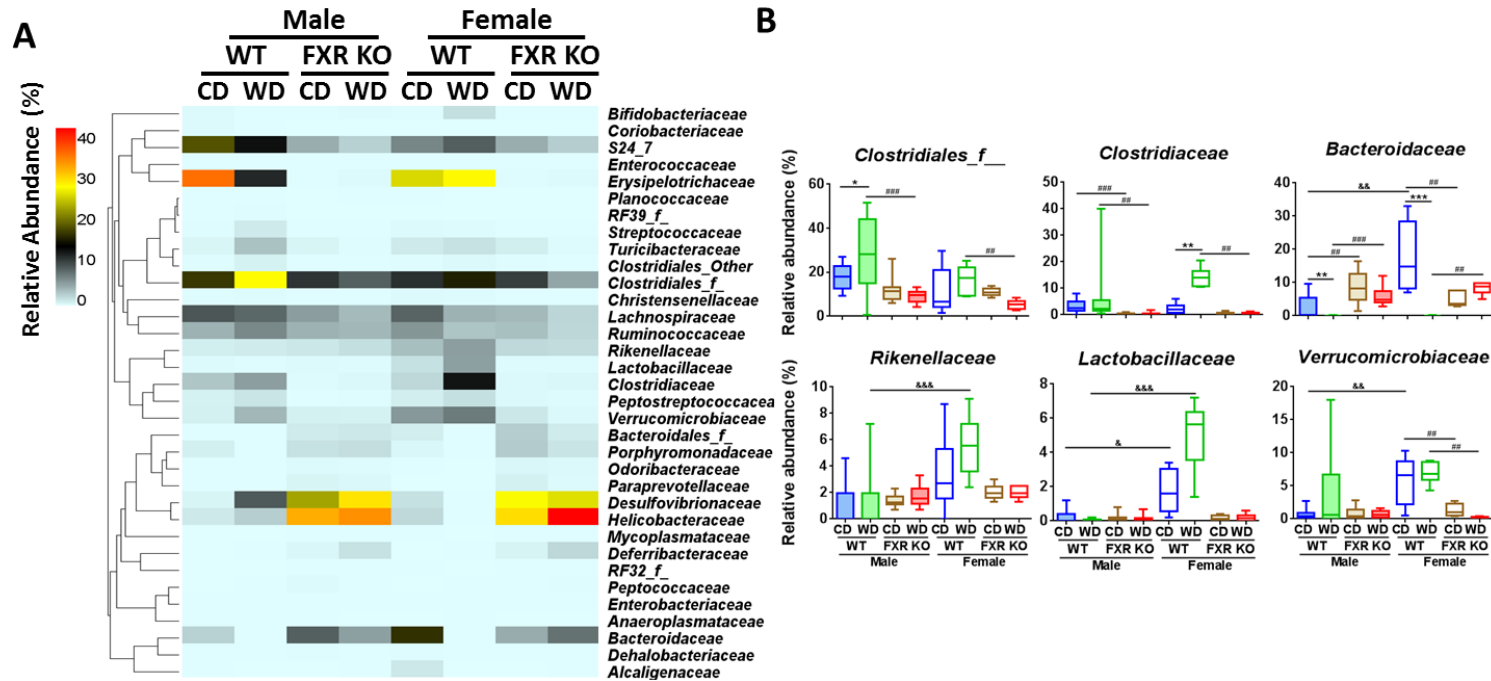

**Fig. S3. Microbiota alteration based on diet, genotype, and gender at family level.** (A) Relative abundance of cecal microbiota at family levels in control diet (CD) and Western diet (WD)-fed WT and FXR KO mice of both genders. Mean value was shown. (B) Relative abundance of cecal microbiota at family level in eight groups (Kruskal-Wallis test). Box plots display the median, 25th percentile, and 75th percentile; whiskers display minimum and maximum values.  $n = 16$  in male groups,  $n = 6$  in female groups. \*  $p < 0.05$ , \*\*  $p < 0.01$ , \*\*\*  $p < 0.001$  for diet comparison; #  $p < 0.05$ , ##  $p < 0.01$ , ###  $p < 0.001$  for genotype comparison; &  $p < 0.05$ , &&  $p < 0.01$ , &&&  $p < 0.001$  for gender comparison.

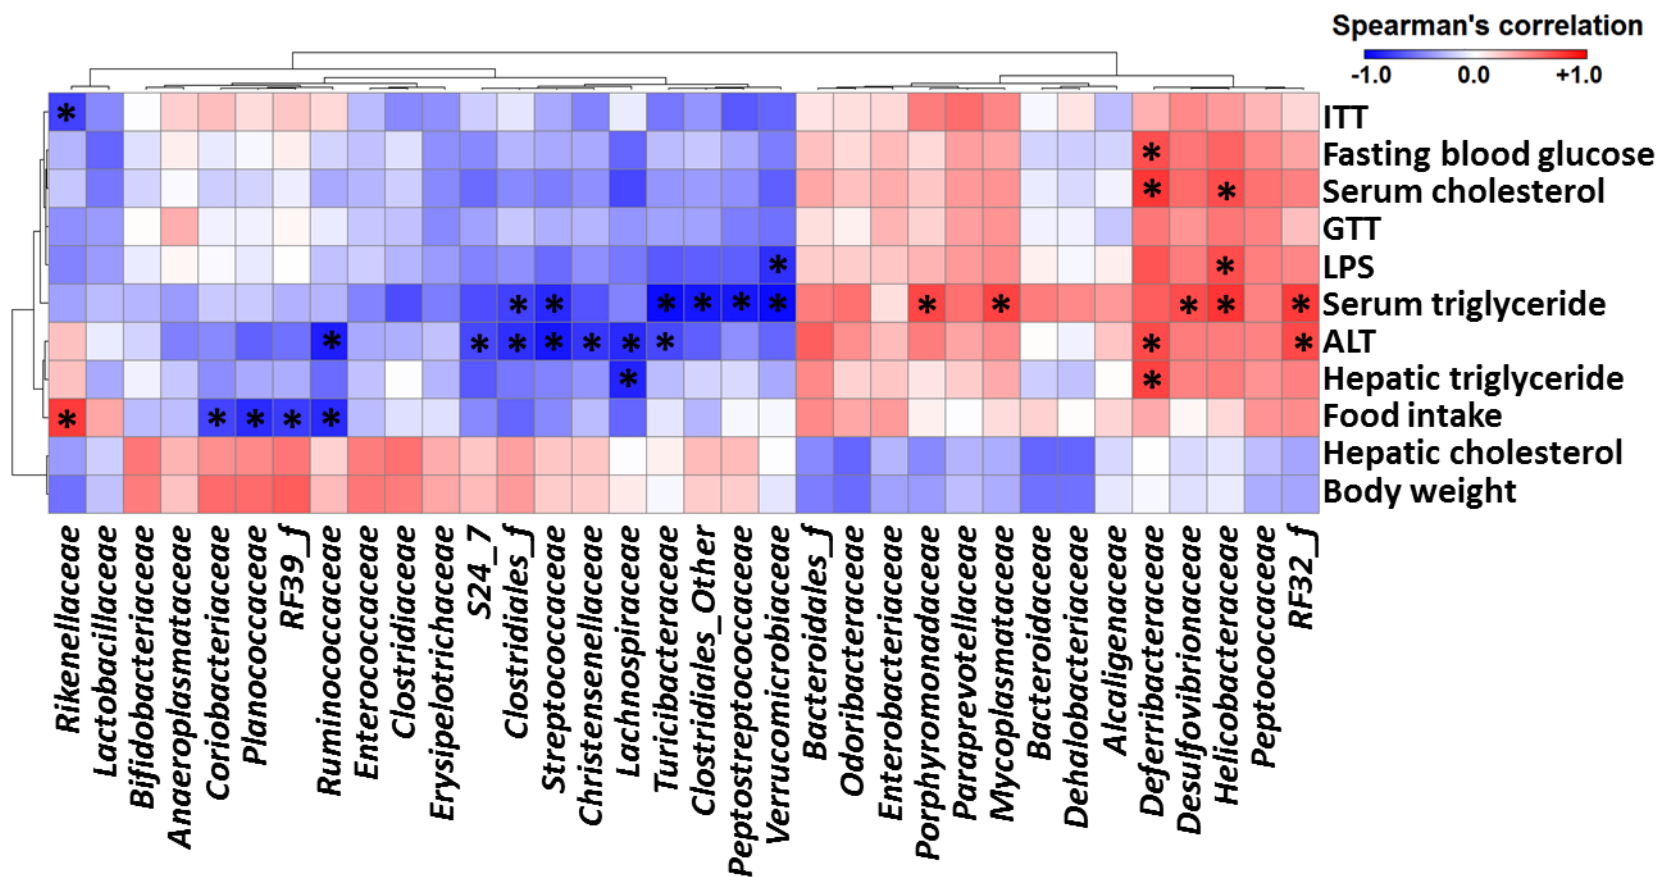

Fig. S4. Spearman's correlation analysis between the abundance of bacterial families and mouse phenotypes. \*  $p < 0.05$ .

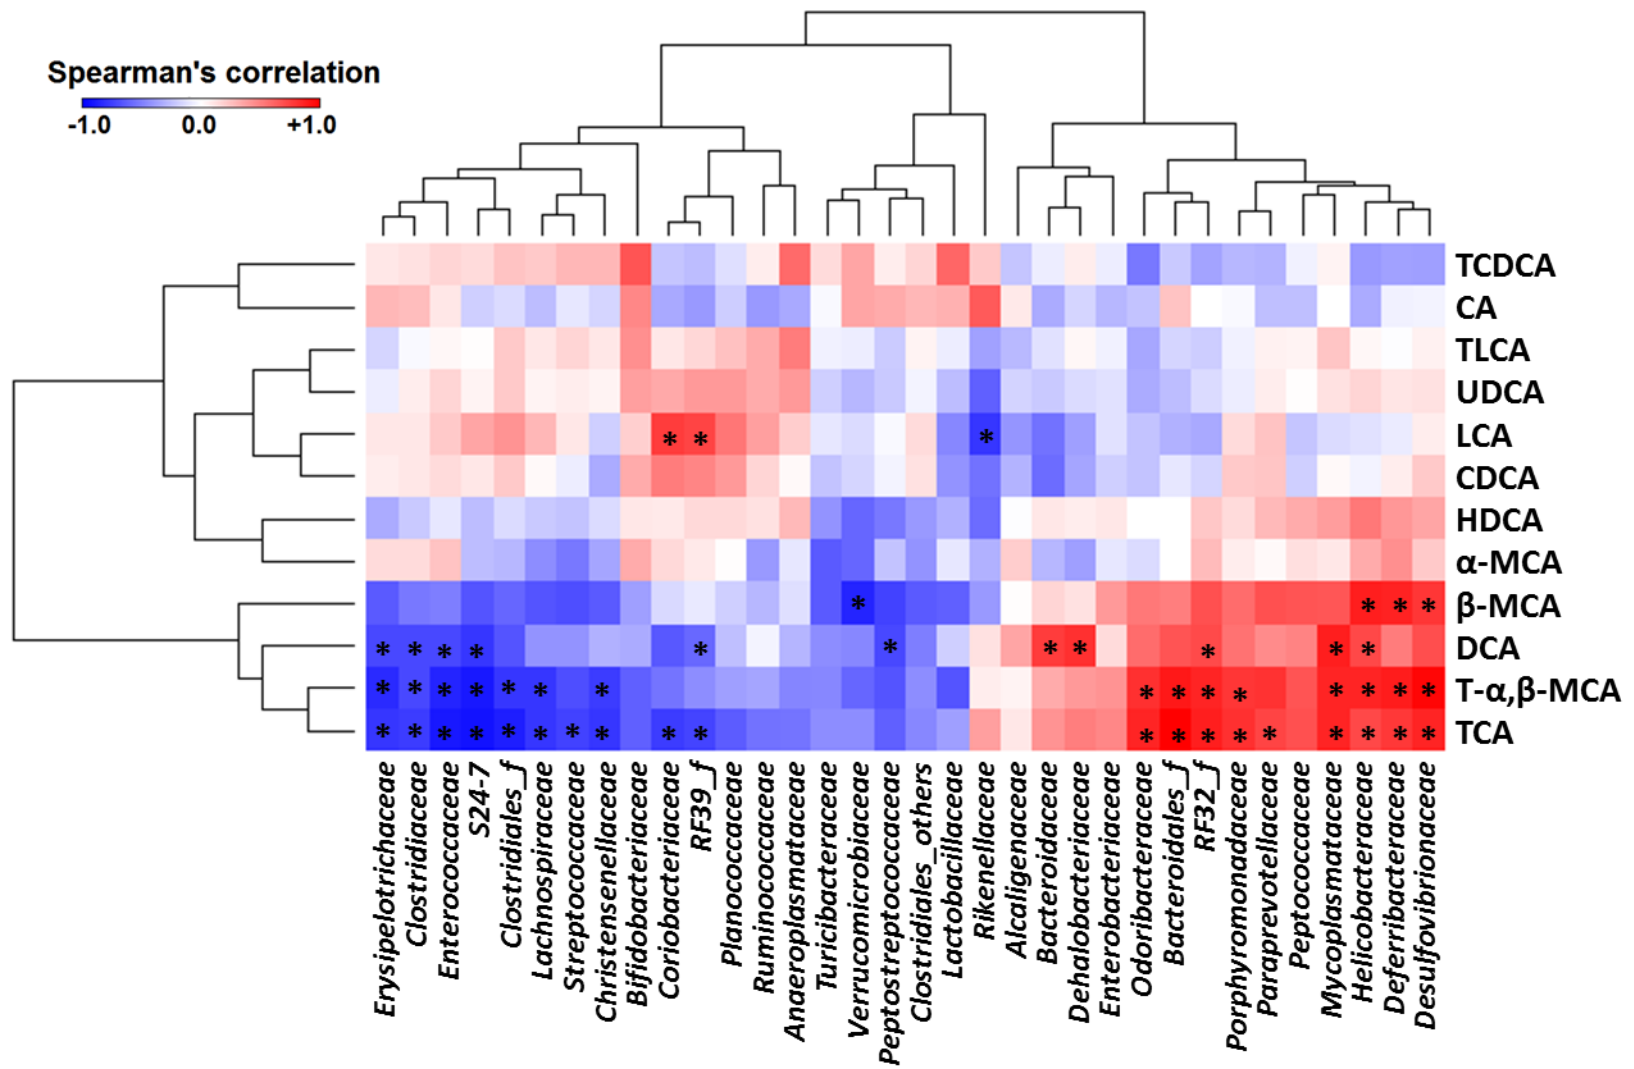

Fig. S5. Spearman's correlation analysis between the abundance of bacterial families and hepatic bile acids. \*  $p < 0.05$ .

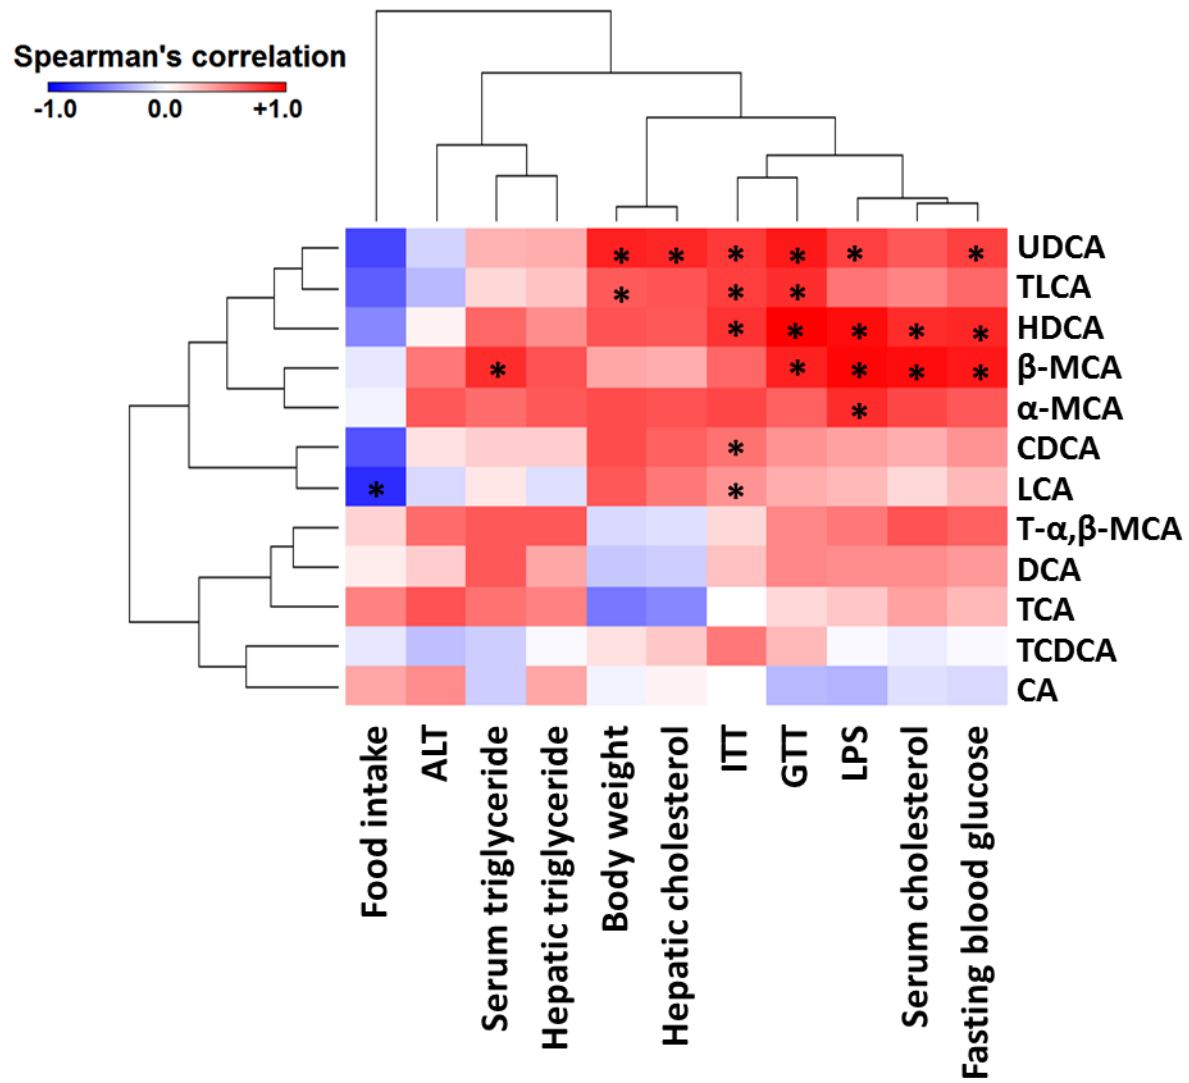

Fig. S6. Spearman's correlation analysis between mouse phenotypes and hepatic bile acids. \*  $p < 0.05$ .

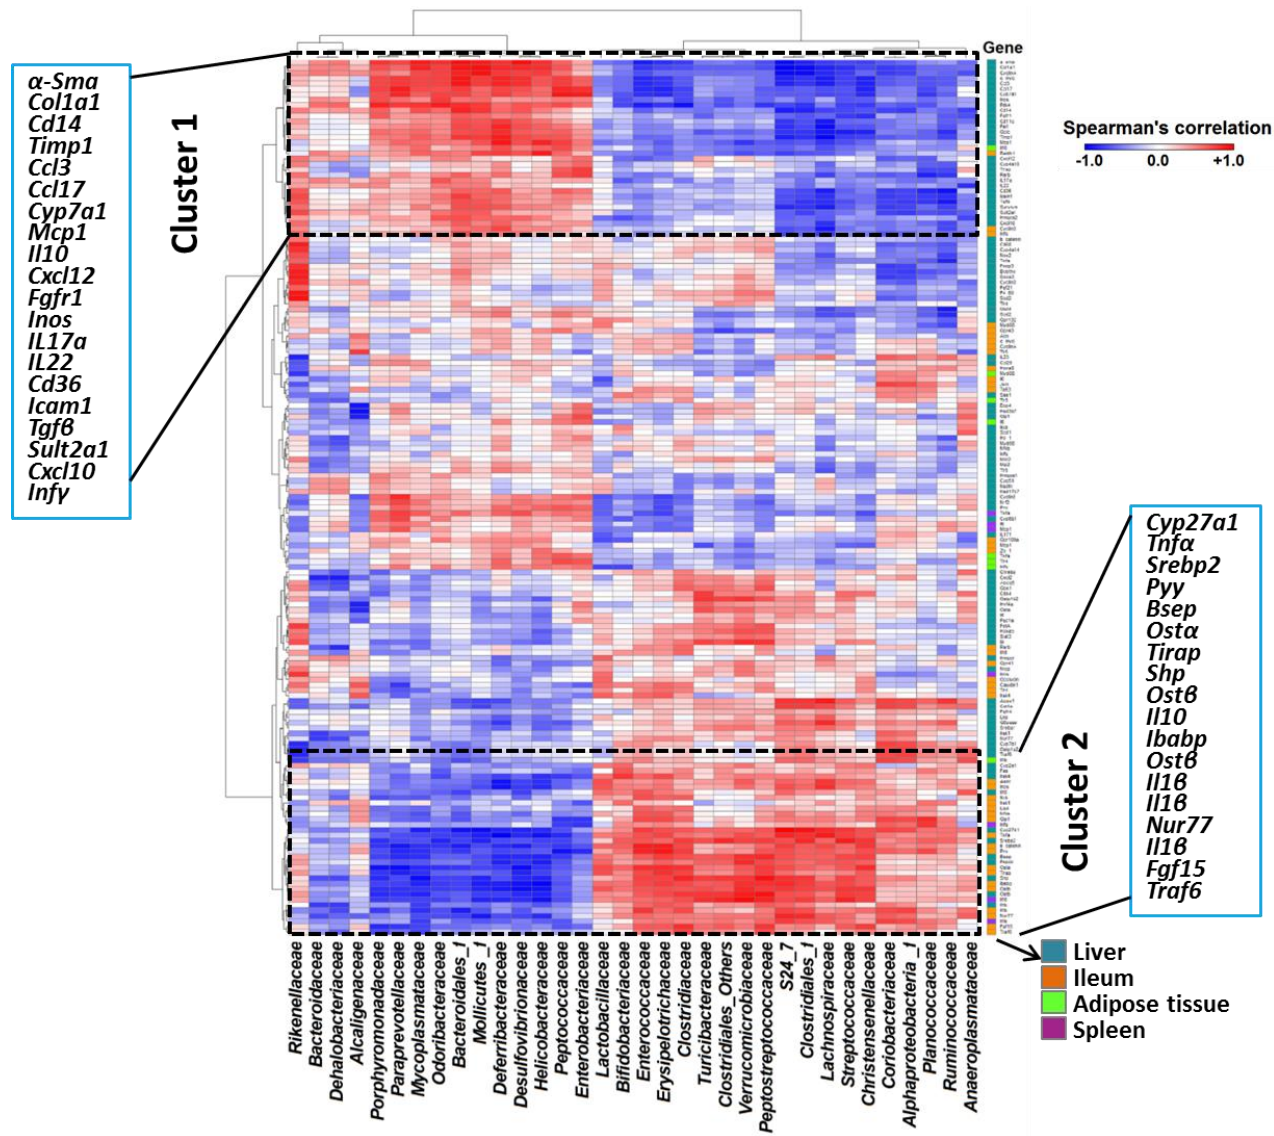

Fig. S7. Spearman's correlation analysis between the abundance of bacterial families and gene expression. \*  $p < 0.05$ .

## REFERENCES

- 1 Yoshimoto, S. *et al.* Obesity-induced gut microbial metabolite promotes liver cancer through senescence secretome. *Nature* **499**, 97-101 (2014).
- 2 Louis, P., Flint, H.J. Development of a semiquantitative degenerate real-time PCR-based assay for estimation of numbers of butyryl-coenzyme A (CoA) CoA transferase genes in complex bacterial samples. *Appl Environ Microb* **73**, 2009-2012 (2007).
- 3 O'Keefe, S.J. *et al.* Fat, fibre and cancer risk in African Americans and rural Africans. *Nat Commun* **6**, 6342 (2015).
- 4 Ijssennagger, N. *et al.* Gut microbiota facilitates dietary heme-induced epithelial hyperproliferation by opening the mucus barrier in colon. *Proc Natl Acad Sci USA* **112**, 10038-10043 (2015).
- 5 Duary RK, Batish VK, Grover S. Relative gene expression of bile salt hydrolase and surface proteins in two putative indigenous *Lactobacillus plantarum* strains under in vitro gut conditions. *Mol Biol Rep* **39**, 2541-52 (2012).
- 6 Chandran A, Duary RK, Grover S, *et al.* Relative expression of bacterial and host specific genes associated with probiotic survival and viability in the mice gut fed with *Lactobacillus plantarum* Lp91. *Microbiol Res* **168**,555-62 (2013).
